# Supplementary material for: Dexmedetomidine Postconditioning Alleviates Hypoxia/Reoxygenation Injury in Senescent Myocardial Cells by Regulating lncRNA H19 and m6A Modification
Source: Hindawi journal article supplement (doi:10.1155/2020/9250512), 2020-01-07
Supplement: f1 [file 9250512.f1.pdf]

## Supplemental Materials

**Supplemental Table 1.** List of Abbreviations.

|                                   |                                                   |
|-----------------------------------|---------------------------------------------------|
| <b>ALKBH5</b>                     | alkB homolog 5                                    |
| <b>ceRNA</b>                      | competitive endogenous RNA                        |
| <b>cIAP1</b>                      | cellular inhibitor of apoptosis protein 1         |
| <b>Dex</b>                        | dexmedetomidine                                   |
| <b>FTO</b>                        | fat mass and obesity-associated protein           |
| <b>H<sub>2</sub>O<sub>2</sub></b> | hydrogen peroxide                                 |
| <b>HNRNPC</b>                     | heterogeneous nuclear ribonucleoprotein C         |
| <b>I/R</b>                        | ischemia/reperfusion                              |
| <b>lncRNA</b>                     | long non-coding RNA                               |
| <b>H/R</b>                        | hypoxia/reperfusion                               |
| <b>m<sup>6</sup>A</b>             | N6-methyladenosine                                |
| <b>MI</b>                         | myocardial infarction                             |
| <b>METTL3</b>                     | methyltransferase like 3                          |
| <b>METTL14</b>                    | methyltransferase like 14                         |
| <b>NC</b>                         | negative control                                  |
| <b>RIP</b>                        | RNA-immunoprecipitation                           |
| <b>WTAP</b>                       | wilms tumor 1-associated protein                  |
| <b>YTHDC1</b>                     | YTH-B homology domain-containing 1                |
| <b>YTHDF1</b>                     | YTH-B homology m <sup>6</sup> A-binding protein 1 |

**Supplemental Table 2.** Primers used for real-time PCR and siRNA sequences.

|                |   |                                 |
|----------------|---|---------------------------------|
| <b>H19</b>     | F | 5'-TAAAGCAGCTGGGGTGGTGAG-3'     |
|                | R | 5'-TGACTGGCAGGCACATCCAC-3'      |
| <b>GAPDH</b>   | F | 5'-GCCAAAAGGGTCATCATCTC-3'      |
|                | R | 5'-GGCCATCCACAGTCTTCT-3'        |
| <b>ALKBH5</b>  | F | 5'-ATTCTCAGGAAGACAAGATTAG-3'    |
|                | R | 5'-TTTTCTTCTTTGTCCATTTC-3'      |
| <b>METTL3</b>  | F | 5'-ATGAAAGCCAGTGACGCT-3'        |
|                | R | 5'-TGCCAGGACTCTCAGAATC-3'       |
| <b>METTL14</b> | F | 5'-AGACGCCTTCATCTCTTCGG-3'      |
|                | R | 5'-AGCCTCTCAATTCCTCGGT-3'       |
| <b>WTAP</b>    | F | 5'-GTTATGGCACGGGATGAGTT-3'      |
|                | R | 5'-ATCTCCTGTTCTTGGTTGC-3'       |
| <b>FTO</b>     | F | 5'-ATGAAAGCGATGACGAGTC-3'       |
|                | R | 5'-AATCCAAGGTGCCTGTTG-3'        |
| <b>YTHDF1</b>  | F | 5'-CCAATAATCAACTGCGGC-3'        |
|                | R | 5'-AGTCGTCAAAGATGGAGGTT-3'      |
| <b>YTHDC1</b>  | F | 5'-TTCATAACATGGGACCACCG-3'      |
|                | R | 5'-TCATAGTCATGTACTCGTTTATCTC-3' |
| <b>HNRNPC</b>  | F | 5'-CAAACGCCAGCGTGTGTCCG-3'      |
|                | R | 5'-TGGGGATGAGAAGGACAAGT-3'      |

|                   |      |                                 |
|-------------------|------|---------------------------------|
| <b>miR-29b-3p</b> | F    | 5'-ACACTCCGGCTGGGTAGCACCATTG-3' |
| <b>U6</b>         | F    | 5'-CTCGCTTCGGCAGCACA-3'         |
|                   | R    | 5'-AACGCTTCACGAATTTGCGT-3'      |
| <b>H19</b>        | 796  | 5'-GCAGGUGAGUCUCCUUCUUTT-3'     |
|                   | 1687 | 5'-GCUGCACUCAGAACCACUAT-3'      |
| <b>cIAP1</b>      | 487  | 5'-ACUUA AUGGCCACAUA CUGUA-3'   |
|                   | 962  | 5'-GCUAGAU AUCCUCAUCUUCTT-3'    |
| <b>ALKBH5</b>     | 810  | 5'-GCCUCAGGACAUCAAGAATT-3'      |
|                   | 1016 | 5'-GGAUCCUGGAAAUGGACAATT-3'     |

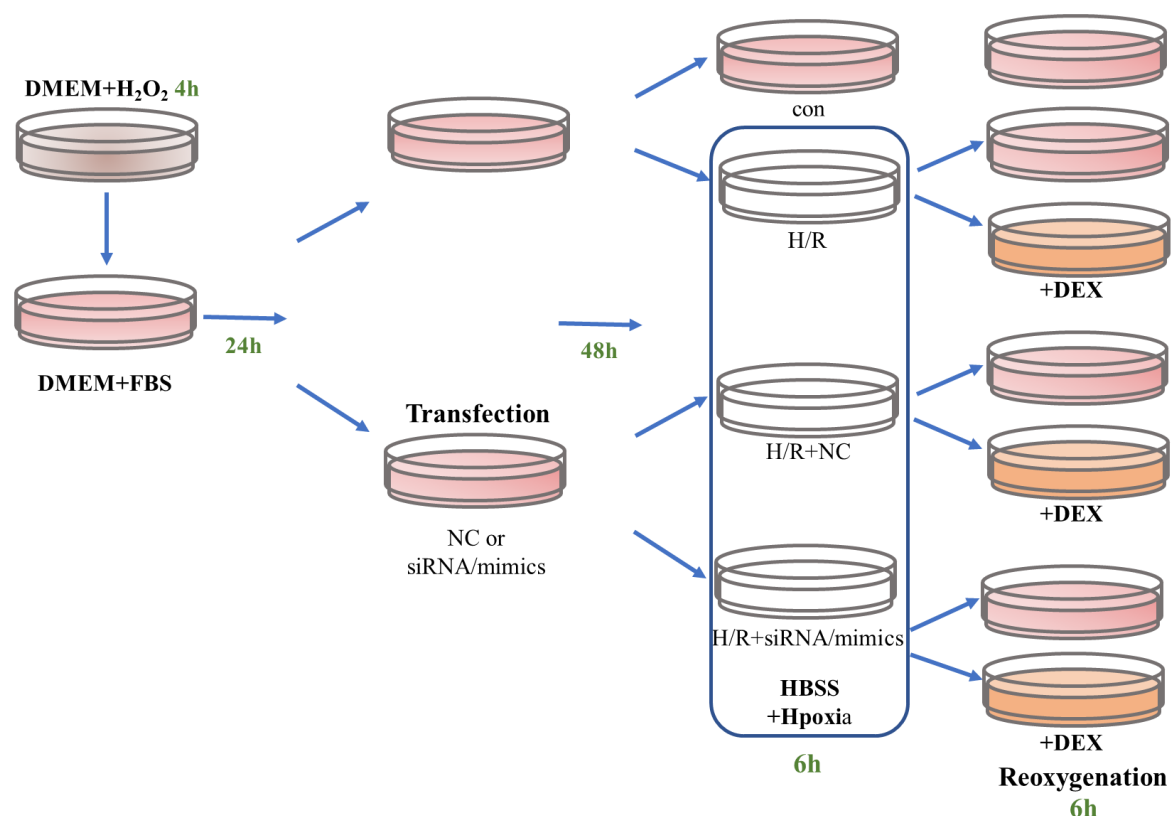

Figure S1. Experimental groupings and protocols. H<sub>2</sub>O<sub>2</sub> was added into DMEM for 4 h to induce the senescence of H9c2 cells. After 24 h, cells were transfected with NC or siRNA/mimics. The medium of the H/R group was changed to HBSS, and cells were kept in an incubator for 6 h of hypoxia. H/R and control groups were replaced with DMEM containing FBS, while Dex postconditioning groups were treated with different concentrations of Dex during 6-h reoxygenation.
